# Supplementary material for: Strengthening Preparedness for Arbovirus Infections in Mediterranean and Black Sea Countries: A Conceptual Framework to Assess Integrated Surveillance in the Context of the One Health Strategy
Source: MDPI journal article supplement (doi:10.3390/ijerph15030489), 2018-03-10
Supplement: s1 [file s1]

**Table S2- Eligible documents**

| n  | Source  | Exposure | title                                                                                       | Author/s                                                                                                  | Year | surveillance | integration | type of integration                                                                                 | levels                                                                             | criteria                                                                                                                                                                                                                            |
|----|---------|----------|---------------------------------------------------------------------------------------------|-----------------------------------------------------------------------------------------------------------|------|--------------|-------------|-----------------------------------------------------------------------------------------------------|------------------------------------------------------------------------------------|-------------------------------------------------------------------------------------------------------------------------------------------------------------------------------------------------------------------------------------|
| 3  | WHO HQ  | DNG      | Dengue: guidelines for diagnosis, treatment, prevention and control. New edition.           | A joint publication of WHO and the Special Programme for Research and Training in Tropical Diseases (TDR) | 2009 | yes          | yes         | human and entomological and environmental<br>Dengue surveillance: examples of good and bad practice | policy and institutional and data collection and analysis and dissemination levels | information exchange on data and analysis surveillance and monitoring of environmental between agencies involved in disease and social risks surveillance, vector surveillance and the monitoring of environmental and social risks |
| 5  | WHO/CDC | Multi    | Technical Guidelines for Integrated Disease Surveillance and Response in the African Region |                                                                                                           | 2010 | yes          | yes         | human and animal and environmental                                                                  | not mentioned                                                                      |                                                                                                                                                                                                                                     |
| 7  | WHO HQ  | DNG      | Global strategy for dengue prevention and control 2012-2020.                                |                                                                                                           | 2012 | yes          | yes         | human and entomological and environmental                                                           | policy and institutional and data collection and analysis and dissemination levels | integrated information system multisectoral dengue action committee an emergency action plan                                                                                                                                        |
| 24 | ECDC    | WNV      | West Nile virus risk assessment tool                                                        |                                                                                                           | 2013 | yes          | yes         | human and animal and entomological and environmental                                                | policy and institutional level                                                     | not mentioned                                                                                                                                                                                                                       |

|    |      |     |                                                              |  |      |     |     |                                                                  |                                                                                      |                                                                                                                                                                                                                                                                                                                                                                                                                                                                                     |
|----|------|-----|--------------------------------------------------------------|--|------|-----|-----|------------------------------------------------------------------|--------------------------------------------------------------------------------------|-------------------------------------------------------------------------------------------------------------------------------------------------------------------------------------------------------------------------------------------------------------------------------------------------------------------------------------------------------------------------------------------------------------------------------------------------------------------------------------|
|    |      |     | Stockholm:<br>ECDC; 2013.                                    |  |      |     |     |                                                                  |                                                                                      |                                                                                                                                                                                                                                                                                                                                                                                                                                                                                     |
| 25 | ECDC | WNV | West Nile<br>virus infection<br>in Greece in<br>2012         |  | 2012 | yes | yes | human and<br>animal and<br>entomological<br>and<br>environmental | policy and<br>institutional<br>level<br><br>data collection<br>and analysis<br>level | The Ministry of Health is<br>currently developing a<br>National Action Plan for<br>vector-borne diseases,<br>including specific sections<br>on malaria, West Nile<br>virus and other vector-<br>borne diseases. The<br>objective is that this<br>National Plan will be<br>endorsed by all involved<br>ministries and provide<br>the necessary legal<br>framework for assigning<br>responsibilities to all<br>stakeholders.<br><br>centralised web<br>platform (MALWEST<br>project ) |
| 30 | ECDC | WNV | Expert<br>consultation<br>on<br>West Nile<br>virus infection |  | 2011 | yes | yes | human and<br>animal and<br>entomological                         | data collection<br>and analysis<br>and<br>dissemination<br>levels                    | not mentioned                                                                                                                                                                                                                                                                                                                                                                                                                                                                       |
| 34 | ECDC | WNV | Expert<br>consultation<br>on West Nile<br>virus infection    |  | 2009 | yes | yes | human and<br>animal and<br>entomological                         | not mentioned                                                                        | -----                                                                                                                                                                                                                                                                                                                                                                                                                                                                               |
