# Supplementary material for: Strengthening Preparedness for Arbovirus Infections in Mediterranean and Black Sea Countries: A Conceptual Framework to Assess Integrated Surveillance in the Context of the One Health Strategy
Source: MDPI journal article supplement (doi:10.3390/ijerph15030489), 2018-03-10
Supplement: s1 [file s1]

| Table S1-Eligible articles |   |          |                                                                                                                 |                       |               |                                                                                                                                                                                                                                                    |                         |                                                                  |                                                                                                                                                           |                                                  |         |                 |
|----------------------------|---|----------|-----------------------------------------------------------------------------------------------------------------|-----------------------|---------------|----------------------------------------------------------------------------------------------------------------------------------------------------------------------------------------------------------------------------------------------------|-------------------------|------------------------------------------------------------------|-----------------------------------------------------------------------------------------------------------------------------------------------------------|--------------------------------------------------|---------|-----------------|
| Ext. N                     | N | Exposure | Article Title                                                                                                   | Journal: Abbreviation | Journal: Year | All Authors (Last, Initials)                                                                                                                                                                                                                       | Type of integration     | Level of integration                                             | criteria                                                                                                                                                  | Added Value                                      | Country | Type of article |
| 1                          | 1 | CHK      | Large number of imported chikungunya cases in mainland France, 2014: a challenge for surveillance and response. | Euro Surveill         | 2014          | Paty, MC; Six, C; Charlet, F; Heuzé, G; Cochet, A; Wiegandt, A; Chappert, JL; Dejour-Salamanca, D; Guinard, A; Soler, P; Servas, V; Vivier-Darrigol, M; Ledrans, M; Debruyne, M; Schaal, O; Jeannin, C; Helynck, B; Leparc-Goffart, I; Coignard, B | human and entomological | policy and institutional and data collection and analysis levels | MoH Plan & Procedures for Human & entomological sectors<br><br>a common system has been set up comprising entomological and epidemiological surveillance. | early warning and impact assessment and response | France  | Description     |
| 30                         | 2 | CHK      | Chikungunya in Europe.                                                                                          | Lancet                | 2008          | Queyriaux, B; Armengaud, A; Jeannin, C; Couturier, E; Peloux-Petiot, F                                                                                                                                                                             | human and entomological | data collection and analysis and dissemination levels            | System operational                                                                                                                                        | early warning                                    | France  | Description     |

|    |   |     |                                                                                    |               |      |                                                                                                                                                                           |                         |                                                                                    |                                                         |                            |                |             |
|----|---|-----|------------------------------------------------------------------------------------|---------------|------|---------------------------------------------------------------------------------------------------------------------------------------------------------------------------|-------------------------|------------------------------------------------------------------------------------|---------------------------------------------------------|----------------------------|----------------|-------------|
| 35 | 3 | CHK | Outbreak of chikungunya in the French Territories, 2006: lessons learned.          | Euro Surveill | 2007 | Ledrans, M; Quatresous, I; Renault, P; Pierre, V                                                                                                                          | human and entomological | data collection and analysis and dissemination levels                              | System operational                                      | early warning              | Réunion Island | Description |
| 36 | 4 | CHK | An outbreak of chikungunya fever in the province of Ravenna, Italy.                | Euro Surveill | 2007 | Angelini, R; Finarelli, AC; Angelini, P; Po, C; Petropulacos, K; Macini, P; Fiorentini, C; Fortuna, C; Venturi, G; Romi, R; Majori, G; Nicoletti, L; Rezza, G; Cassone, A | human and entomological | policy and institutional and data collection and analysis and dissemination levels | Regional protocol<br><br>System operational             | early warning and response | Italy          | Description |
| 43 | 5 | CHK | E-alert 27 January: Chikungunya outbreak in Reunion, a French overseas department. | Euro Surveill | 2006 | Quatresous, I; ,                                                                                                                                                          | human and entomological | policy and institutional and data collection and analysis and dissemination levels | Plan and Procedures available<br><br>System operational | response                   | Réunion Island | Description |

|    |   |     |                                                                                                                              |                    |      |                                                                                                                                                                                                                                                          |                         |                                    |                    |                                                  |              |             |
|----|---|-----|------------------------------------------------------------------------------------------------------------------------------|--------------------|------|----------------------------------------------------------------------------------------------------------------------------------------------------------------------------------------------------------------------------------------------------------|-------------------------|------------------------------------|--------------------|--------------------------------------------------|--------------|-------------|
| 69 | 6 | DNG | Nation-wide, web-based, geographic information system for the integrated surveillance and control of dengue fever in Mexico. | PLoS One           | 2013 | Hernández-Ávila, JE; Rodríguez, MH; Santos-Luna, R; Sánchez-Castañeda, V; Román-Pérez, S; Ríos-Salgado, VH; Salas-Sarmiento, JA                                                                                                                          | human and entomological | data collection and analysis level | System operational | early warning and impact assessment and response | Mexico       | Description |
| 90 | 7 | DNG | Dengue Tools: innovative tools and strategies for the surveillance and control of dengue.                                    | Glob Health Action | 2012 | Wilder-Smith, A; Renhorn, KE; Tissera, H; Abu Bakar, S; Alphey, L; Kittayapong, P; Lindsay, S; Logan, J; Hatz, C; Reiter, P; Rocklöv, J; Byass, P; Louis, VR; Tozan, Y; Massad, E; Tenorio, A; Lagneau, C; L'Ambert, G; Brooks, D; Wegerdt, J; Gubler, D |                         | not mentioned                      |                    | not mentioned                                    | Multicountry | Project     |

|     |   |     |                                                                                                                                                                   |                                     |      |                                                                                                                                                                      |                                                         |                                                                   |                                                                    |                                      |                  |             |
|-----|---|-----|-------------------------------------------------------------------------------------------------------------------------------------------------------------------|-------------------------------------|------|----------------------------------------------------------------------------------------------------------------------------------------------------------------------|---------------------------------------------------------|-------------------------------------------------------------------|--------------------------------------------------------------------|--------------------------------------|------------------|-------------|
| 101 | 8 | DNG | Best practice<br>s in<br>dengue<br>surveilla<br>nce: a<br>report<br>from<br>the<br>Asia-<br>Pacific<br>and<br>America<br>s<br>Dengue<br>Preventi<br>on<br>Boards. | PLoS<br>Negl<br>Trop Dis            | 2010 | Beatty, ME; Stone, A; Fitzsimons, DW; Hanna, JN; Lam, SK; Vong, S; Guzman, MG; Mendez-Galvan, JF; Halstead, SB; Letson, GW; Kuritsky, J; Mahoney, R; Margolis, HS; , | human and<br>entomologic<br>al                          | data<br>collection and<br>analysis level                          | System to be<br>implemented                                        | early warning<br>and response        | Multico<br>untry | Description |
| 134 | 9 | DNG | An<br>integrat<br>ed<br>ecosyste<br>m<br>approac<br>h for<br>sustaina<br>ble<br>preventi<br>on and<br>control<br>of<br>dengue<br>in<br>Central<br>Havana.         | Int J<br>Occup<br>Environ<br>Health | 2006 | Bonet, M; Spiegel, JM; Ibarra, AM; Kouri, G; Pintre, A; Yassi, A                                                                                                     | human and<br>entomologic<br>al and<br>environmen<br>tal | data<br>collection and<br>analysis and<br>dissemination<br>levels | Project: pilot<br>integrated<br>surveillance<br>system in<br>place | impact<br>assessment and<br>response | Cuba             | Project     |

|     |    |     |                                                                                        |                     |      |                                                             |                                           |                                                                                    |                                                     |                                                  |                 |             |
|-----|----|-----|----------------------------------------------------------------------------------------|---------------------|------|-------------------------------------------------------------|-------------------------------------------|------------------------------------------------------------------------------------|-----------------------------------------------------|--------------------------------------------------|-----------------|-------------|
| 137 | 10 | DNG | Dengue prevention and 35 years of vector control in Singapore.                         | Emerg Infect Dis    | 2006 | Ooi, EE; Goh, KT; Gubler, DJ                                | human and entomological and environmental | policy and institutional and data collection and analysis and dissemination levels | National strategy and integrated system recommended | early warning and impact assessment and response | Singapore       | Description |
| 140 | 11 | DNG | Impact of vector control on a dengue fever outbreak in Trinidad, West Indies, in 1998. | Trop Med Int Health | 2005 | Chadee, DD; Williams, FL; Kitron, UD                        | human and entomological                   | data collection and analysis level                                                 | Not mentioned                                       | impact assessment                                | Trinidad        | Description |
| 157 | 12 | DNG | Dengue surveillance in the Pacific Islands.                                            | Pac Health Dialog   | 2000 | Condon, R; Taleo, G; Stewart, T; Sweeney, T; Kiedrzyński, T | human and entomological                   | not mentioned                                                                      | -----                                               | early warning and impact assessment and response | Pacific Islands | Description |

|     |    |     |                                                                                                                                     |                    |      |                                                                                          |                  |                                                       |                      |                                                  |               |             |
|-----|----|-----|-------------------------------------------------------------------------------------------------------------------------------------|--------------------|------|------------------------------------------------------------------------------------------|------------------|-------------------------------------------------------|----------------------|--------------------------------------------------|---------------|-------------|
| 180 | 13 | RVF | Outbreaks of Rift Valley fever in Kenya, Somalia and United Republic of Tanzania, December 2006-April 2007.                         | Wkly Epidemiol Rec | 2007 |                                                                                          | human and animal | not mentioned                                         | -----                | impact assessment and response                   | Multicountry  | Description |
| 191 | 14 | WNV | West Nile virus and non-West Nile virus mortality and coinfection of American crows ( <i>Corvus brachyrhynchos</i> ) in California. | Avian Dis          | 2014 | Wheeler, SS; Woods, LW; Boyce, WM; Eckstrand, CD; Langevin, SA; Reisen, WK; Townsend, AK | human and animal | data collection and analysis and dissemination levels | Study: not mentioned | early warning and impact assessment and response | United States | Study       |

|     |    |       |                                                                                                                                                 |                           |      |                                                                                                                                                                                                                                           |                         |                                                                                    |                                          |                                                  |               |             |
|-----|----|-------|-------------------------------------------------------------------------------------------------------------------------------------------------|---------------------------|------|-------------------------------------------------------------------------------------------------------------------------------------------------------------------------------------------------------------------------------------------|-------------------------|------------------------------------------------------------------------------------|------------------------------------------|--------------------------------------------------|---------------|-------------|
| 189 | 15 | Multi | National capacity for surveillance, prevention, and control of West Nile virus and other arboviruses infections-- United States, 2004 and 2012. | MMWR Morb Mortal Wkly Rep | 2014 | Hadler, JL; Patel, D; Bradley, K; Hughes, JM; Blackmore, C; Etkind, P; Kan, L; Getchell, J; Blumenstock, J; Engel, J; ,                                                                                                                   | human and entomological | policy and institutional level                                                     | National Plan and Cooperative Agreements | early warning and impact assessment and response | United States | Assessment  |
| 5   | 16 | Multi | Human and entomological surveillance of West Nile fever, dengue and chikungunya in Veneto Region, Italy, 2010-2012.                             | BMC Infect Dis            | 2014 | Gobbi, F; Capelli, G; Angheben, A; Giobbia, M; Conforto, M; Franzetti, M; Cattelan, AM; Raise, E; Rovere, P; Mulatti, P; Montarsi, F; Drago, A; Barzon, L; Napoletano, G; Zanella, F; Pozza, F; Russo, F; Rosi, P; Palù, G; Bisoffi, Z; , | human and entomological | policy and institutional and data collection and analysis and dissemination levels | Regional Plan System in place            | early warning and response                       | Italy         | Description |

|     |    |     |                                                                                                    |                                 |      |                                                                                                                                      |                                                      |                                                                                    |               |                                                  |       |             |
|-----|----|-----|----------------------------------------------------------------------------------------------------|---------------------------------|------|--------------------------------------------------------------------------------------------------------------------------------------|------------------------------------------------------|------------------------------------------------------------------------------------|---------------|--------------------------------------------------|-------|-------------|
| 192 | 17 | WNV | Integrated human surveillance systems of West Nile virus infections in Italy: the 2012 experience. | Int J Environ Res Public Health | 2013 | Napoli, C; Bella, A; Declich, S; Grazzini, G; Lombardini, L; Nanni Costa, A; Nicoletti, L; Pompa, MG; Pupella, S; Russo, F; Rizzo, C | human and animal and entomological and environmental | policy and institutional and data collection and analysis and dissemination levels | National Plan | early warning and impact assessment and response | Italy | Description |
|-----|----|-----|----------------------------------------------------------------------------------------------------|---------------------------------|------|--------------------------------------------------------------------------------------------------------------------------------------|------------------------------------------------------|------------------------------------------------------------------------------------|---------------|--------------------------------------------------|-------|-------------|



|     |    |       |                                                                                                                                      |                         |      |                                                                                                                       |                         |               |       |                            |               |            |
|-----|----|-------|--------------------------------------------------------------------------------------------------------------------------------------|-------------------------|------|-----------------------------------------------------------------------------------------------------------------------|-------------------------|---------------|-------|----------------------------|---------------|------------|
| 193 | 18 | Multi | Analysis of surveillance systems in place in European Mediterranean countries for West Nile virus (WNV) and Rift Valley fever (RVF). | Transboundary Emerg Dis | 2013 | Cito, F; Narcisi, V; Danzetta, ML; Iannetti, S; Sabatino, DD; Bruno, R; Carvelli, A; Atzeni, M; Sauro, F; Calistri, P | human and animal        | not mentioned | ----- | early warning and response | Multicountry  | Assessment |
| 199 | 19 | WNV   | The 2012 West Nile encephalitis epidemic in Dallas, Texas.                                                                           | JAMA                    | 2013 | Chung, WM; Buseman, CM; Joyner, SN; Hughes, SM; Fomby, TB; Luby, JP; Haley, RW                                        | human and entomological | not mentioned | ----- | early warning and response | United States | Study      |

|     |    |     |                                                                                          |               |      |                                                                                                                                                                                                                                    |                                    |                                                                                    |               |                                |        |             |
|-----|----|-----|------------------------------------------------------------------------------------------|---------------|------|------------------------------------------------------------------------------------------------------------------------------------------------------------------------------------------------------------------------------------|------------------------------------|------------------------------------------------------------------------------------|---------------|--------------------------------|--------|-------------|
| 211 | 20 | WNV | Emergence of West Nile virus infections in humans in Turkey, 2010 to 2011.               | Euro Surveill | 2012 | Kalaycioglu, H; Korukluoglu, G; Ozkul, A; Oncul, O; Tosun, S; Karabay, O; Gozalan, A; Uyar, Y; Caglayik, DY; Atasoylu, G; Altas, AB; Yolbakan, S; Ozden, TN; Bayrakdar, F; Sezak, N; Pelitli, TS; Kurtcebe, ZO; Aydın, E; Ertek, M | human and animal and entomological | policy and institutional and data collection and analysis and dissemination levels | National Plan | impact assessment and response | Turkey | Description |
| 212 | 21 | WNV | Epidemiological surveillance of West Nile neuroinvasive diseases in Italy, 2008 to 2011. | Euro Surveill | 2012 | Rizzo, C; Salcuni, P; Nicoletti, L; Ciufolini, MG; Russo, F; Masala, R; Frongia, O; Finarelli, AC; Gramegna, M; Gallo, L; Pompa, MG; Rezza, G; Salmaso, S; Declich, S                                                              | human and animal and entomological | policy and institutional and data collection and analysis and dissemination levels | National Plan | early warning and response     | Italy  | Description |

|     |           |     |                                                                                       |                  |      |                                                                                                                                                                                |                                    |                                                                                    |                                     |                            |        |             |
|-----|-----------|-----|---------------------------------------------------------------------------------------|------------------|------|--------------------------------------------------------------------------------------------------------------------------------------------------------------------------------|------------------------------------|------------------------------------------------------------------------------------|-------------------------------------|----------------------------|--------|-------------|
| 216 | <b>22</b> | WNV | West Nile fever outbreak in horses and humans, Spain, 2010.                           | Emerg Infect Dis | 2011 | García-Bocanegra, I; Jaén-Téllez, JA; Napp, S; Arenas-Montes, A; Fernández-Morente, M; Fernández-Molera, V; Arenas, A                                                          | human and animal and entomological | policy and institutional and data collection and analysis and dissemination levels | National Plan                       | early warning              | Spain  | Description |
| 233 | <b>23</b> | WNV | Ongoing outbreak of West Nile virus infections in humans in Greece, July-August 2010. | Euro Surveill    | 2010 | Papa, A; Danis, K; Baka, A; Bakas, A; Dougas, G; Lytras, T; Theocharopoulos, G; Chrysagis, D; Vassiliadou, E; Kamaria, F; Liona, A; Mellou, K; Saroglou, G; Panagiotopoulos, T | human and animal and entomological | policy and institutional and data collection and analysis and dissemination levels | National Plan Website dissemination | early warning and response | Greece | Description |

|     |    |     |                                                                                                |               |      |                                                                                                                                                                                                  |                                    |                                                                                    |                                        |                            |         |             |
|-----|----|-----|------------------------------------------------------------------------------------------------|---------------|------|--------------------------------------------------------------------------------------------------------------------------------------------------------------------------------------------------|------------------------------------|------------------------------------------------------------------------------------|----------------------------------------|----------------------------|---------|-------------|
| 236 | 24 | WNV | West Nile virus circulation in Emilia-Romagna, Italy: the integrated surveillance system 2009. | Euro Surveill | 2010 | Angelini, P; Tamba, M; Finarelli, AC; Bellini, R; Albieri, A; Bonilauri, P; Cavrini, F; Dottori, M; Gaibani, P; Martini, E; Mattivi, A; Pierro, AM; Rugna, G; Sambri, V; Squintani, G; Macini, P | human and animal and entomological | policy and institutional and data collection and analysis and dissemination levels | Regional Plan Integrated dissemination | early warning and response | Italy   | Description |
| 243 | 25 | WNV | West Nile virus infections in Hungary , August-September 2008.                                 | Euro Surveill | 2008 | Krisztalovics, K; Ferenczi, E; Molnar, Z; Csohan, A; Ban, E; Zoldi, V; Kaszas, K                                                                                                                 | human and animal                   | policy and institutional and data collection and analysis and dissemination levels | National Plan                          | early warning and response | Hungary | Description |

|     |           |     |                                                                                                                            |                    |      |                                                                                                                                                                                                        |                                    |                                                       |                              |                            |               |             |
|-----|-----------|-----|----------------------------------------------------------------------------------------------------------------------------|--------------------|------|--------------------------------------------------------------------------------------------------------------------------------------------------------------------------------------------------------|------------------------------------|-------------------------------------------------------|------------------------------|----------------------------|---------------|-------------|
| 263 | <b>26</b> | WNV | A GIS-driven integrated real-time surveillance pilot system for national West Nile virus dead bird surveillance in Canada. | Int J Health Geogr | 2006 | Shuai, J; Buck, P; Sockett, P; Aramini, J; Pollari, F                                                                                                                                                  | human and animal                   | not mentioned                                         | -----                        | early warning              | Canada        | Description |
| 280 | <b>27</b> | WNV | Assessment of surveillance of human West Nile virus infection in Quebec, 2003.                                             | Can Commun Dis Rep | 2004 | Gaulin, C; Couillard, M; Pilon, PA; Tremblay, M; Lambert, L; Fradet, MD; Deschênes, L; Fortin, A; Poulin, C                                                                                            | human and animal and entomological | data collection and analysis and dissemination levels | computerized system in place | early warning and response | Canada        | Assessment  |
| 281 | <b>28</b> | WNV | Department of Defense West Nile virus surveillance in 2002.                                                                | Mil Med            | 2004 | Witt, CJ; Brundage, M; Cannon, C; Cox, K; Clements, TE; Cooper, ED; Elbert, Y; Ludwig, GV; Mangiafico, JA; Malakooti, M; Miller, MK; Osborn, SD; Pagac, B; Ross, LP; Shelton, LJ; Spring, A; Kelley, P | human and animal                   | data collection and analysis and dissemination levels | Not mentioned                | early warning and response | United States | Description |

|     |    |     |                                                                                                                                            |                             |      |                                                                                                                                      |                                    |                                                                                    |                                                                                            |                                                  |               |             |
|-----|----|-----|--------------------------------------------------------------------------------------------------------------------------------------------|-----------------------------|------|--------------------------------------------------------------------------------------------------------------------------------------|------------------------------------|------------------------------------------------------------------------------------|--------------------------------------------------------------------------------------------|--------------------------------------------------|---------------|-------------|
| 296 | 29 | WNV | Surveillance results from the first West Nile virus transmission season in Florida, 2001.                                                  | Am J Trop Med Hyg           | 2003 | Blackmore, CG; Stark, LM; Jeter, WC; Oliveri, RL; Brooks, RG; Conti, LA; Wiersma, ST                                                 | human and animal and entomological | policy and institutional and data collection and analysis and dissemination levels | Not mentioned                                                                              | early warning and impact assessment and response | United States | Study       |
| 321 | 30 | WNV | West Nile virus: a case study in how NY State Health Information infrastructure facilitates preparation and response to disease outbreaks. | J Public Health Manag Pract | 2001 | Gotham, IJ; Eidson, M; White, DJ; Wallace, BJ; Chang, HG; Johnson, GS; Napoli, JP; Sottolano, DL; Birkhead, GS; Morse, DL; Smith, PF | human and animal and entomological | policy and institutional and data collection and analysis and dissemination levels | National Plan<br>Web-based exchange of electronic information<br><br>Dissemination formats | impact assessment and response                   | United States | Description |

|     |    |     |                                                                                                                       |                  |      |                                                                                                                       |                                                      |                                                                                    |                                                                                               |                            |               |             |
|-----|----|-----|-----------------------------------------------------------------------------------------------------------------------|------------------|------|-----------------------------------------------------------------------------------------------------------------------|------------------------------------------------------|------------------------------------------------------------------------------------|-----------------------------------------------------------------------------------------------|----------------------------|---------------|-------------|
| 327 | 31 | WNV | West Nile virus surveillance in Connecticut in 2000: an intense epizootic without high risk for severe human disease. | Emerg Infect Dis | 2001 | Hadler, J; Nelson, R; McCarthy, T; Andreadis, T; Lis, MJ; French, R; Beckwith, W; Mayo, D; Archambault, G; Cartter, M | human and animal and entomological                   | policy and institutional and data collection and analysis and dissemination levels | Different databased used in the analysis                                                      | early warning and response | United States | Description |
| 331 | 32 | WNV | West Nile virus 2000-2001.                                                                                            | N J Med          | 2001 | Ziskin, LZ                                                                                                            | human and animal and entomological and environmental | not mentioned                                                                      | -----                                                                                         | early warning              | United States | Description |
| 332 | 33 | WNV | West Nile virus: New Jersey's 2000 experience and surveillance plans for 2001.                                        | N J Med          | 2001 | Farello, CA; Sorhage, FE; Bresnitz, EA; Grant, C                                                                      | human and animal and entomological and environmental | policy and institutional and data collection and analysis and dissemination levels | Integrated working group; Regular meetings; Integrated database; Publication on CDC's website | early warning and response | United States | Description |

|     |           |     |                                                                                                |                 |      |                                                                                                                                                                  |                                    |                                |               |                            |               |             |
|-----|-----------|-----|------------------------------------------------------------------------------------------------|-----------------|------|------------------------------------------------------------------------------------------------------------------------------------------------------------------|------------------------------------|--------------------------------|---------------|----------------------------|---------------|-------------|
| 337 | <b>34</b> | WNV | The West Nile virus: its recent emergence in North America .                                   | Microbes Infect | 2001 | Garmendia, AE; Van Kruiningen, HJ; French, RA                                                                                                                    | human and animal and entomological | not mentioned                  | -----         | early warning and response | United States | Description |
| 338 | <b>35</b> | WNV | West nile virus surveillance in Romania: 1997-2000.                                            | Viral Immunol   | 2001 | Ceianu, CS; Ungureanu, A; Nicolescu, G; Cernescu, C; Nitescu, L; Tardei, G; Petrescu, A; Pitigoi, D; Martin, D; Ciulacu-Purcarea, V; Vladimirescu, A; Savage, HM | human and animal and entomological | policy and institutional level | Not mentioned | early warning and response | Romania       | Description |
| 341 | <b>36</b> | WNV | Outbreak not contained. West Nile virus triggers a reevaluation of public health surveillance. | Sci Am          | 2000 | Holloway, M                                                                                                                                                      | human and animal and entomological | not mentioned                  | -----         | early warning and response | NA-overview   | Description |
